# Supplementary material for: Immune response to influenza vaccination in the elderly is altered by chronic medication use
Source: PubMed Central journal article supplement (PMC6119322; doi:10.1186/s12979-018-0124-9), 2018-08-31
Supplement: 12979_2018_124_MOESM2_ESM.pdf [file 12979_2018_124_MOESM2_ESM.pdf]

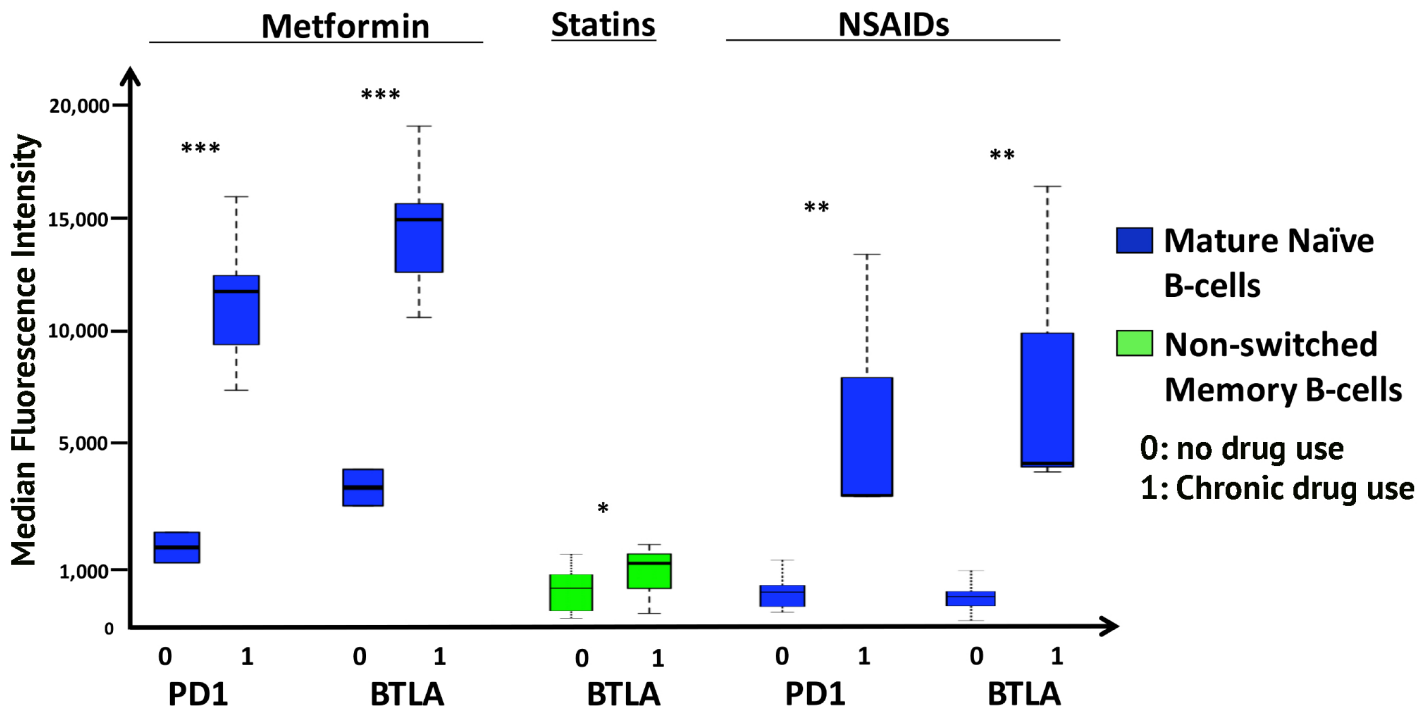

**Supplementary Fig. 2**

The boxplots show MFI levels of significantly altered markers, PD1 and BTLA, on different B-cell subsets from individuals with no history of medication use, compared with individuals using Metformin, NSAIDs or Statins as described in legend to Figure 3. The B-cell subsets were identified using flow cytometry. Pair-wise differences between the cohorts in each panel were performed using the Mann-Whitney U Test. Significant differences are indicated by stars: \* p-values ≤ 0.05, \*\* p-values ≤ 5x10<sup>-3</sup>, \*\*\* p-value ≤ 5x10<sup>-4</sup>.
