# Supplementary material for: Immune response to influenza vaccination in the elderly is altered by chronic medication use
Source: PubMed Central journal article supplement (PMC6119322; doi:10.1186/s12979-018-0124-9), 2018-08-31
Supplement: 12979_2018_124_MOESM3_ESM.pdf [file 12979_2018_124_MOESM3_ESM.pdf]

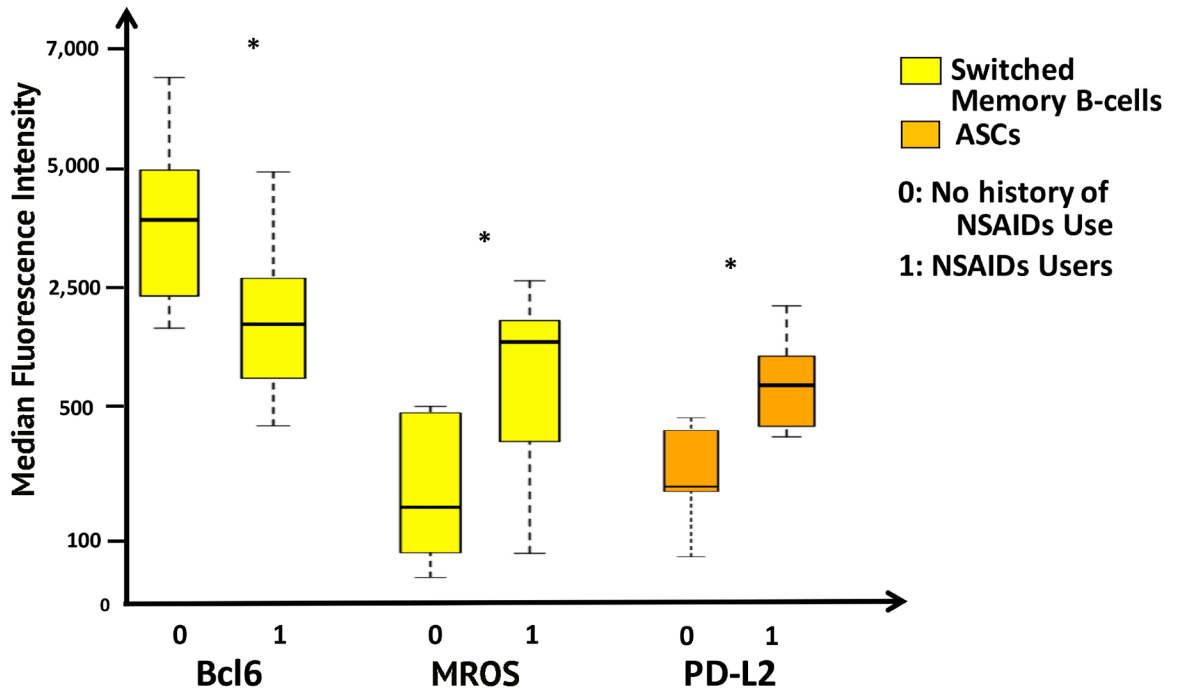

**Supplementary Fig. 3**

The boxplots show MFI levels of significantly altered markers, Bcl-6, MROS and PD-L2, on different B-cell subsets from individuals with no history of medication use, compared with individuals using NSAIDs. as described in legend to Figure 3. Pair-wise differences between the cohorts in each panel were performed using the Mann-Whitney U Test, Significant differences are indicated by stars: \* p-value  $\leq 0.05$ , \*\* p-value  $\leq 5 \times 10^{-3}$ , \*\*\* p-value  $\leq 5 \times 10^{-4}$ .
